# Supplementary material
Source: PubMed Central journal article supplement (PMC2604960)
Supplement: 0810730105_0810730105SI.pdf [file 0810730105_0810730105SI.pdf]

# Supporting Information

Prokhnevsky *et al.* 10.1073/pnas.0810730105

Table S1. Statistical analysis of the *Arabidopsis* phenotypes

| Parameter                   | Plant line    | No. of plants analyzed | Scheffe group | Mean | SD  | Median |
|-----------------------------|---------------|------------------------|---------------|------|-----|--------|
| Height, cm                  | Columbia-0    | 64                     | A             | 19.4 | 3.0 | 19.7   |
|                             | <i>xi-k12</i> | 53                     | B             | 16.8 | 4.5 | 18.0   |
|                             | <i>xi-2/b</i> | 62                     | B             | 16.5 | 4.0 | 17.2   |
|                             | <i>xi-k11</i> | 65                     | C             | 14.0 | 2.8 | 14.5   |
| Rosette width, cm           | <i>xi-k12</i> | 53                     | A             | 5.7  | 1.0 | 5.7    |
|                             | Columbia-0    | 64                     | B             | 5.2  | 0.8 | 5.2    |
|                             | <i>xi-2/b</i> | 62                     | B             | 5.2  | 0.7 | 5.2    |
|                             | <i>xi-k11</i> | 65                     | C             | 3.9  | 0.5 | 3.8    |
| Weight, g                   | <i>xi-k12</i> | 53                     | A             | 1.0  | 0.4 | 1.1    |
|                             | Columbia-0    | 64                     | B             | 0.8  | 0.2 | 0.8    |
|                             | <i>xi-2/b</i> | 62                     | B             | 0.8  | 0.2 | 0.7    |
|                             | <i>xi-k11</i> | 65                     | C             | 0.5  | 0.1 | 0.5    |
| Number of seeds per silique | Columbia-0    | 25                     | A             | 51.0 | 3.2 | 51.0   |
|                             | <i>xi-2/b</i> | 25                     | A             | 50.7 | 7.3 | 53.0   |
|                             | <i>xi-k12</i> | 25                     | A             | 48.9 | 4.5 | 49.0   |
|                             | <i>xi-k11</i> | 25                     | B             | 40.6 | 6.0 | 40.0   |
